# Supplementary material for: Bounds on the distribution of the number of gaps when circles and lines are covered by fragments: Theory and practical application to genomic and metagenomic projects
Source: PubMed Central journal article supplement (PMC1821341; doi:10.1186/1471-2105-8-70), 2007-03-02
Supplement: 1471-2105-8-70-S1.pdf [file 1471-2105-8-70-S1.pdf]

## Additional file 1: Methods

### Proof of Propositions 1 and 2

Consider a circle with circumference of length 1. Place  $n$  particles  $X_1, \dots, X_n$  uniformly and independently at random on the circle. Choose one of the particles and label it  $X_{n,1}$ . We may imagine that the circle is cut at this point, and opened out into a line segment of length 1. We then label one end of the line segment as the point 0, and the other end as the point 1. Let  $X_{n,2}, \dots, X_{n,n}$  denote the positions on the line segment of the remaining  $n-1$  particles, arranged in increasing order:  $0 = X_{n,1} \leq X_{n,2} \leq \dots \leq X_{n,n} \leq 1$ . Let  $L_k$  be the distances between neighbouring points,

$$L_k = \begin{cases} X_{n,k+1} - X_{n,k} & \text{if } 1 \leq k \leq n-1 \\ 1 - X_{n,n} & \text{if } k = n. \end{cases}$$

This is illustrated in Figure 2.

We wish to approximate the probability that  $L_k \leq s_k$  for all except  $w$  of the  $k$ 's, where the  $s_1, \dots, s_n$  are given real numbers between 0 and 1: that is,

$$\mathbb{P}[W(s_1, \dots, s_n) \leq w]$$

where  $W(t_1, \dots, t_n) = \sum_{k=1}^n \chi_k(t_k)$  and the function  $\chi_i(s)$  takes the value 1 if  $L_i > s$  and 0 otherwise. We will apply the Chen-Stein method, which provides an approximation provided we can calculate the first two moments of  $W$  and establish certain properties of the  $\chi_i$ .

**Theorem 1 (from Lindvall, 2002)** *Let  $\{Y_i\}_{i=1}^n$  be Bernoulli random variables on a probability space  $(\Omega, \mathcal{F}, \mathbb{P})$ , and let  $W = \sum_{i=1}^n Y_i$ . For each  $1 \leq k \leq n$  let  $U_k$  and  $V_k$  be random variables with  $U_k \stackrel{d}{=} W$ , and  $1 + V_k$  having distribution*

$$\mathbb{P}[W \in \cdot | Y_k = 1]$$

( $\stackrel{d}{=}$  denotes equality in distribution). Then

$$\sup_{A \subseteq \mathbb{Z}_+} |\mathbb{P}[W \in A] - p_{\mathbb{E}[W]}[A]| \leq (1 \wedge \mathbb{E}[W]^{-1}) \sum_{k=1}^n \mathbb{P}[Y_k = 1] \mathbb{E}[|U_k - V_k|],$$

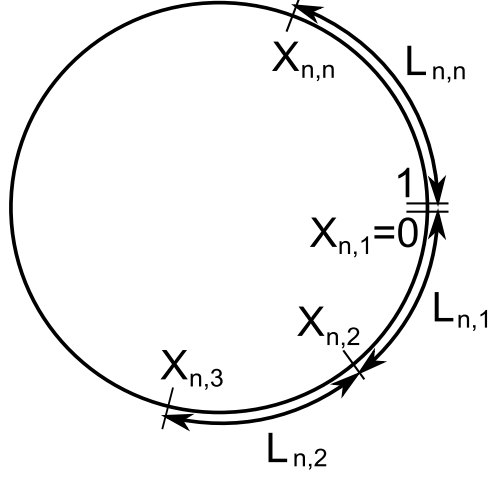

Figure 2: Arc and particle positions on the circle.

where  $p_\lambda$  represents the Poisson distribution with parameter  $\lambda$ . In particular when  $U_k \geq V_k$  for all  $k$  we have

$$\sup_{A \subseteq \mathbb{Z}_+} |\mathbb{P}[W \in A] - p_{\mathbb{E}[W]}[A]| \leq (1 \wedge E[W]^{-1})(\mathbb{E}[W] - \text{Var}[W]) \quad (1)$$

where  $\text{Var}[W]$  is the variance of  $W$ .

We first verify the conditions of Theorem 1. For each  $i$  set  $Y_i = \chi_i(s_i)$ , and for each  $k$  put  $U_k = W$  and  $V_k = \sum_{i \neq k} \chi_i(s_i / (1 - s_k))$ . Clearly  $U_k \geq V_k$  for all  $k$ ; to see that the distributions  $\mathbb{P}[1 + V_k \in \cdot]$  and  $\mathbb{P}[W \in \cdot | Y_k = 1]$  are equal, we have

$$\mathbb{P}[W = m | \chi_k(s_k) = 1] = \frac{\mathbb{P}\left[\sum_{i \neq k} \chi_i(s_i) = m - 1, \chi_k(s_k) = 1\right]}{\mathbb{P}[\chi_k(s_k) = 1]}.$$

The event in the numerator can only occur if both  $\chi_k(s_k) = 1$  and there exist  $i_1 < \dots < i_{m-1} \in \{1, \dots, n\} \setminus \{k\}$  such that  $\chi_{i_j}(s_{i_j}) = 1$  for  $1 \leq j \leq m - 1$ , and  $\chi_l(s_l) = 0$  otherwise. Applying the definition of  $\chi_i$  we have

$$\begin{aligned} & \mathbb{P}[W = m | \chi_k(s_k) = 1] & (2) \\ &= \sum_{\substack{i_1 < \dots < i_{m-1} \in \\ \{1, \dots, n\} \setminus \{k\}}} \frac{\mathbb{P}[L_{i_1} > s_{i_1}, \dots, L_{i_{m-1}} > s_{i_{m-1}}, L_k > s_k, L_l \leq s_l \text{ otherwise}]}{\mathbb{P}[L_k > s_k]} \end{aligned}$$

Now

$$\mathbb{P}[1 + V_k = m] = \mathbb{P}\left[\sum_{i \neq k} \chi_i\left(\frac{s_i}{1 - s_k}\right) = m - 1\right]$$

and similarly the above event can only occur if there exist  $i_1 < \dots < i_{m-1} \in \{1, \dots, n\} \setminus \{k\}$  with  $\chi_{i_j}(s_{i_j}/(1-s_k)) = 1$  for  $1 \leq j \leq m-1$  and  $\chi_l(s_l/(1-s_k)) = 0$  otherwise:

$$\mathbb{P}[1 + V_k = m] = \sum_{\substack{i_1 < \dots < i_{m-1} \in \\ \{1, \dots, n\} \setminus \{k\}}} \mathbb{P} \left[ L_{i_1} > \frac{s_{i_1}}{1-s_k}, \dots, L_{i_{m-1}} > \frac{s_{i_{m-1}}}{1-s_k}, \right. \\ \left. L_k \in \mathbb{R}, L_l \leq \frac{s_l}{1-s_k} \text{ otherwise} \right] \quad (3)$$

The equality of  $\mathbb{P}[W = m | Y_k = 1]$  and  $\mathbb{P}[1 + V_k = m]$  then follows by applying the inclusion-exclusion formula, Lemma 1 to equations (2) and (3) as follows.

$$\begin{aligned} & \mathbb{P} \left[ L_{i_1} > \frac{s_{i_1}}{1-s_k}, \dots, L_{i_{m-1}} > \frac{s_{i_{m-1}}}{1-s_k}, L_k \in \mathbb{R}, L_l \leq \frac{s_l}{1-s_k} \text{ otherwise} \right] \\ &= \sum_{j=1}^{n-m} \sum_{a_1 < \dots < a_j} (-1)^j \mathbb{P} \left[ L_l > \frac{s_l}{1-s_k} \text{ for } l = i_1, \dots, i_{m-1}, a_1, \dots, a_j \right] \\ &= \sum_{j=1}^{n-m} \sum_{a_1 < \dots < a_j} (-1)^j \left( 1 - \left( \frac{\sum_{l=1}^{m-1} s_{i_l} + \sum_{l=1}^j s_{a_l}}{1-s_k} \right)_+ \right)^{n-1} \\ &= \sum_{j=1}^{n-m} \sum_{a_1 < \dots < a_j} (-1)^j \frac{(1-s_k - \sum_{l=1}^{m-1} s_{i_l} - \sum_{l=1}^j s_{a_l})_+^{n-1}}{(1-s_k)^{n-1}} \\ &= \sum_{j=1}^{n-m} \sum_{a_1 < \dots < a_j} (-1)^j \frac{\mathbb{P}[L_l > s_l \text{ for } l = i_1, \dots, i_{m-1}, k, a_1, \dots, a_j]}{\mathbb{P}[L_k > s]} \\ &= \frac{\mathbb{P}[L_{i_1} > s_{i_1}, \dots, L_{i_{m-1}} > s_{i_{m-1}}, L_k > s_k, L_l \leq s_l \text{ otherwise}]}{\mathbb{P}[L_k > s]}. \end{aligned}$$

where it is understood that in the sums, no  $a_l$  is equal to  $k$  or to any  $i_l$ .

To calculate the required moments of  $W$  we use the following result:

**Lemma 1 (Stevens, 1939)** *For any subset  $I \subseteq \{1, \dots, n\}$  and any  $t_k \in [0, 1]$  for all  $k \in I$  we have*

$$\mathbb{P}[L_k > t_k \text{ for all } k \in I] = \left( 1 - \sum_{k \in I} t_k \right)_+^{n-1},$$

Then by the definition of  $W$  and Lemma 1

$$\mathbb{E}[W(s_1, \dots, s_n)] = \sum_{k=1}^n (1-s_k)^{n-1}$$

The variance of  $W$  is

$$\begin{aligned} \text{Var}[W(s_1, \dots, s_n)] &= \mathbb{E}[W(s_1, \dots, s_n)^2] - \mathbb{E}[W(s_1, \dots, s_n)]^2 \\ &= \sum_{k=1}^n (1 - s_k)^{n-1} + \sum_{l \neq k} (1 - s_l - s_k)_+^{n-1} - \mathbb{E}[W(s_1, \dots, s_n)]^2 \end{aligned}$$

Setting all  $s_i$  equal to  $s$  gives Propositions 1 and 2.

### Proof of Proposition 3

This follows from the above proof after the following observations:

1. In the above proof, placing  $N$  random points on an interval is equivalent to placing  $N + 1$  random points on a circle. Neglecting the end gaps is then equivalent to considering  $W' = \sum_{i=2}^N Y_i$ . Calculation of the mean and variance of  $W'$  gives the error bound in Proposition 2 when  $n = N - 1$ .
2. If  $N$  arcs of length  $S$  are placed uniformly at random on an interval of length 1 so that each lies wholly on the interval, then their left endpoints are uniformly distributed on the interval  $(0, 1 - S)$ . By scaling, we may therefore use the above proof with  $n = N + 1$  and  $s = S/(1 - S)$ . Also by scaling, the requirement that no uncovered gaps exist except end gaps of length at most  $d$  is equivalent to taking  $s_1 = s_{N+1} = \frac{d}{1-S}$ ,  $s_i = \frac{S}{1-S}$  otherwise.

### Discussion of Figure 1

It should not be inferred from Figure 1 that the error bound curves converge as  $s \rightarrow 0$ . Indeed, Huillet (2003) proves that for a fixed coverage depth, the number of gaps almost surely tends to infinity as  $s \rightarrow 0$ .
